# Supplementary material for: Chemical and genetic discrimination of commercial Guangchenpi (Citrus reticulata ‘Chachi’) by using UPLC-QTOF-MS/MS based metabolomics and DNA barcoding approaches
Source: PubMed Central journal article supplement (PMC9067315; doi:10.1039/c9ra03740c), 2019-07-29
Supplement: RA-009-C9RA03740C-s001.pdf [file RA-009-C9RA03740C-s001.pdf]

Table S1 Samples used in present study

| Sample | Species                              | Voucher ID | Harvest Years | Collection Location                 |
|--------|--------------------------------------|------------|---------------|-------------------------------------|
| Cp-1   | <i>Citrus reticulata</i> ‘Tangerina’ | cpt1601    | 2016          | Lukou Town, Zhuzhou, Hunan          |
| Cp-2   | <i>Citrus reticulata</i> ‘Tangerina’ | cpt1602    | 2016          | Lukou Town, Zhuzhou, Hunan          |
| Cp-3   | <i>Citrus reticulata</i> ‘Tangerina’ | cpt1603    | 2016          | Lukou Town, Zhuzhou, Hunan          |
| Cp-4   | <i>Citrus reticulata</i> ‘Tangerina’ | cpt1701    | 2017          | Lukou Town, Zhuzhou, Hunan          |
| Cp-5   | <i>Citrus reticulata</i> ‘Tangerina’ | cpt1702    | 2017          | Lukou Town, Zhuzhou, Hunan          |
| Cp-6   | <i>Citrus reticulata</i> ‘Tangerina’ | cpt1604    | 2016          | Nanchang, Jiangxi                   |
| Cp-7   | <i>Citrus reticulata</i> ‘Tangerina’ | cpt1605    | 2016          | Nanchang, Jiangxi                   |
| Cp-8   | <i>Citrus reticulata</i> ‘Tangerina’ | cpt1606    | 2016          | Nanchang, Jiangxi                   |
| Cp-9   | <i>Citrus reticulata</i> ‘Tangerina’ | cpt1607    | 2016          | Nanchang, Jiangxi                   |
| Cp-10  | <i>Citrus reticulata</i> ‘Tangerina’ | cpt1703    | 2017          | Nanchang, Jiangxi                   |
| Cp-11  | <i>Citrus reticulata</i> ‘Tangerina’ | cpt1704    | 2017          | Nanchang, Jiangxi                   |
| Cp-12  | <i>Citrus reticulata</i> ‘Tangerina’ | cpt1705    | 2017          | Nanchang, Jiangxi                   |
| Cp-13  | <i>Citrus reticulata</i> ‘Tangerina’ | cpt1706    | 2017          | Nanchang, Jiangxi                   |
| Cp-14  | <i>Citrus reticulata</i> ‘Unshiu’    | cpu1601    | 2016          | Huangyan District, Taizhou Zhejiang |
| Cp-15  | <i>Citrus reticulata</i> ‘Unshiu’    | cpu1602    | 2016          | Huangyan District, Taizhou Zhejiang |
| Cp-16  | <i>Citrus reticulata</i> ‘Unshiu’    | cpu1701    | 2017          | Huangyan District, Taizhou Zhejiang |
| Cp-17  | <i>Citrus reticulata</i> ‘Unshiu’    | cpu1702    | 2017          | Huangyan District, Taizhou Zhejiang |
| Cp-18  | <i>Citrus reticulata</i> ‘Unshiu’    | cpu1703    | 2017          | Huangyan District, Taizhou Zhejiang |
| Cp-19  | <i>Citrus reticulata</i> ‘Unshiu’    | cpu1704    | 2017          | Huangyan District, Taizhou Zhejiang |
| Cp-20  | <i>Citrus reticulata</i> ‘Unshiu’    | cpu1705    | 2017          | Huangyan District, Taizhou Zhejiang |
| Cp-21  | <i>Citrus reticulata</i> ‘Unshiu’    | cpu1706    | 2017          | Huangyan District, Taizhou Zhejiang |
| Cp-22  | <i>Citrus reticulata</i> ‘Unshiu’    | cpu1707    | 2017          | Huangyan District, Taizhou Zhejiang |
| Cp-23  | <i>Citrus reticulata</i> ‘Unshiu’    | cpu1708    | 2017          | Huangyan District, Taizhou Zhejiang |
| Cp-24  | <i>Citrus reticulata</i> ‘Unshiu’    | cpu1709    | 2017          | Huangyan District, Taizhou Zhejiang |
| Cp-25  | <i>Citrus reticulata</i> ‘Unshiu’    | cpu1710    | 2017          | Huangyan District, Taizhou Zhejiang |
| Cp-26  | <i>Citrus reticulata</i> ‘Unshiu’    | cpu1711    | 2017          | Yichang, Hubei                      |
| Cp-27  | <i>Citrus reticulata</i> ‘Unshiu’    | cpu1712    | 2017          | Yichang, Hubei                      |
| Cp-28  | <i>Citrus reticulata</i> ‘Unshiu’    | cpu1713    | 2017          | Yichang, Hubei                      |
| Cp-29  | <i>Citrus reticulata</i> ‘Dahongpao’ | cpd1601    | 2016          | Zigong, Sichuan                     |
| Cp-30  | <i>Citrus reticulata</i> ‘Dahongpao’ | cpd1602    | 2016          | Zigong, Sichuan                     |
| Cp-31  | <i>Citrus reticulata</i> ‘Dahongpao’ | cpd1701    | 2017          | Zigong, Sichuan                     |
| Gcp-1  | <i>Citrus reticulata</i> ‘Chachi’    | gcp1601    | 2016          | Xinhui, Guangdong                   |
| Gcp-2  | <i>Citrus reticulata</i> ‘Chachi’    | gcp1602    | 2016          | Xinhui, Guangdong                   |
| Gcp-3  | <i>Citrus reticulata</i> ‘Chachi’    | gcp1603    | 2016          | Xinhui, Guangdong                   |
| Gcp-4  | <i>Citrus reticulata</i> ‘Chachi’    | gcp1604    | 2016          | Xinhui, Guangdong                   |
| Gcp-5  | <i>Citrus reticulata</i> ‘Chachi’    | gcp1605    | 2016          | Xinhui, Guangdong                   |

|        |                                   |         |      |                   |
|--------|-----------------------------------|---------|------|-------------------|
| Gcp-6  | <i>Citrus reticulata</i> 'Chachi' | gcp1606 | 2016 | Xinhui, Guangdong |
| Gcp-7  | <i>Citrus reticulata</i> 'Chachi' | gcp1701 | 2017 | Xinhui, Guangdong |
| Gcp-8  | <i>Citrus reticulata</i> 'Chachi' | gcp1702 | 2017 | Xinhui, Guangdong |
| Gcp-9  | <i>Citrus reticulata</i> 'Chachi' | gcp1703 | 2017 | Xinhui, Guangdong |
| Gcp-10 | <i>Citrus reticulata</i> 'Chachi' | gcp1704 | 2017 | Xinhui, Guangdong |
| Gcp-11 | <i>Citrus reticulata</i> 'Chachi' | gcp1705 | 2017 | Xinhui, Guangdong |
| Gcp-12 | <i>Citrus reticulata</i> 'Chachi' | gcp1710 | 2017 | Xinhui, Guangdong |
| Gcp-13 | <i>Citrus reticulata</i> 'Chachi' | gcp1711 | 2017 | Xinhui, Guangdong |
| Gcp-14 | <i>Citrus reticulata</i> 'Chachi' | gcp1712 | 2017 | Xinhui, Guangdong |
| Gcp-15 | <i>Citrus reticulata</i> 'Chachi' | gcp1620 | 2016 | Xinhui, Guangdong |
| Gcp-16 | <i>Citrus reticulata</i> 'Chachi' | gcp1621 | 2016 | Xinhui, Guangdong |
| Gcp-17 | <i>Citrus reticulata</i> 'Chachi' | gcp1501 | 2015 | Xinhui, Guangdong |
| Gcp-18 | <i>Citrus reticulata</i> 'Chachi' | gcp1502 | 2015 | Xinhui, Guangdong |
| Gcp-19 | <i>Citrus reticulata</i> 'Chachi' | gcp1503 | 2015 | Sihui, Guangdong  |
| Gcp-20 | <i>Citrus reticulata</i> 'Chachi' | gcp1504 | 2015 | Sihui, Guangdong  |

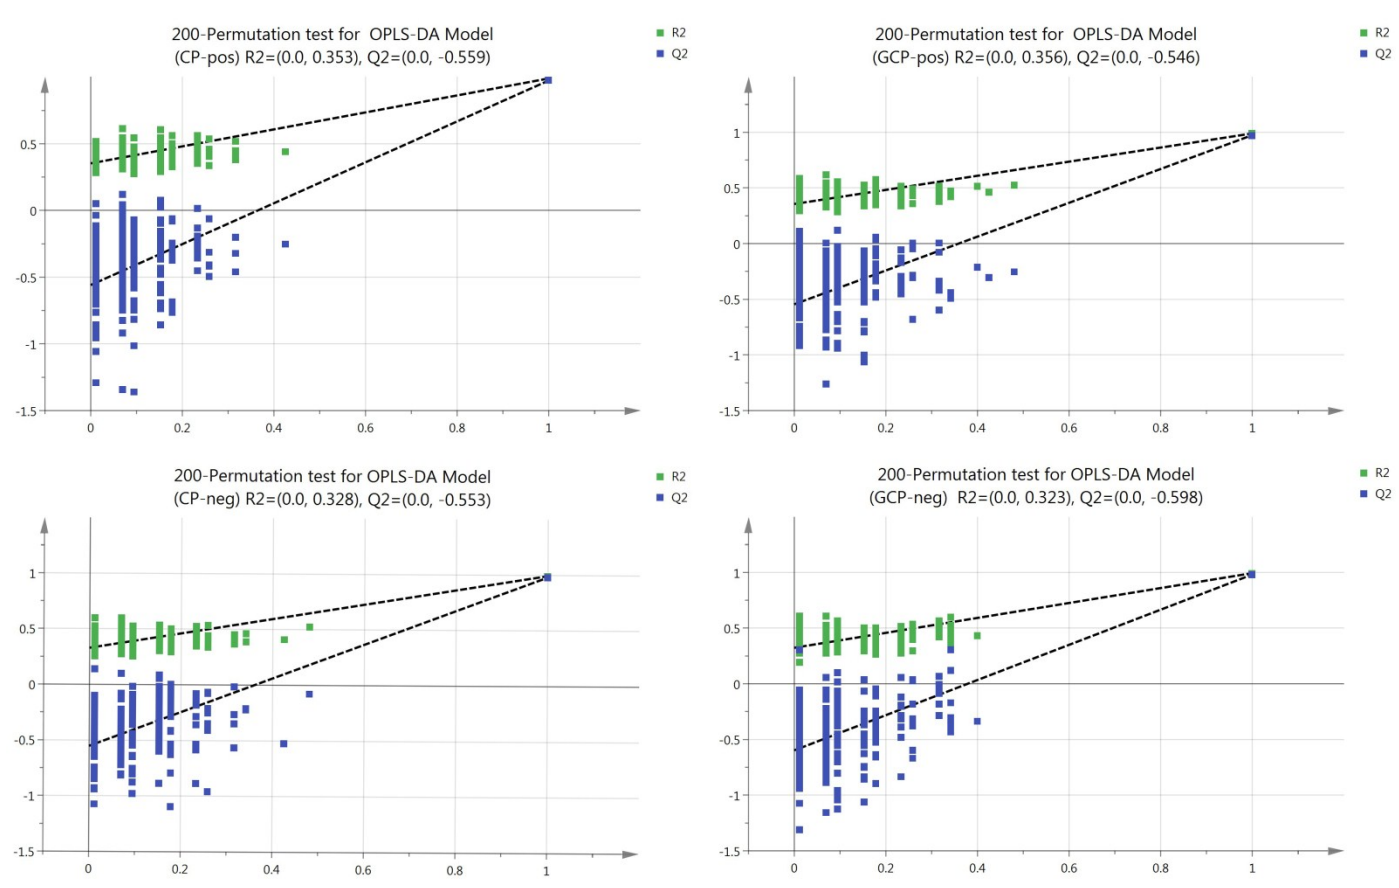

Figure S1 Permutations test plot for OPLS-DA (200 tests) in positive and negative mode.

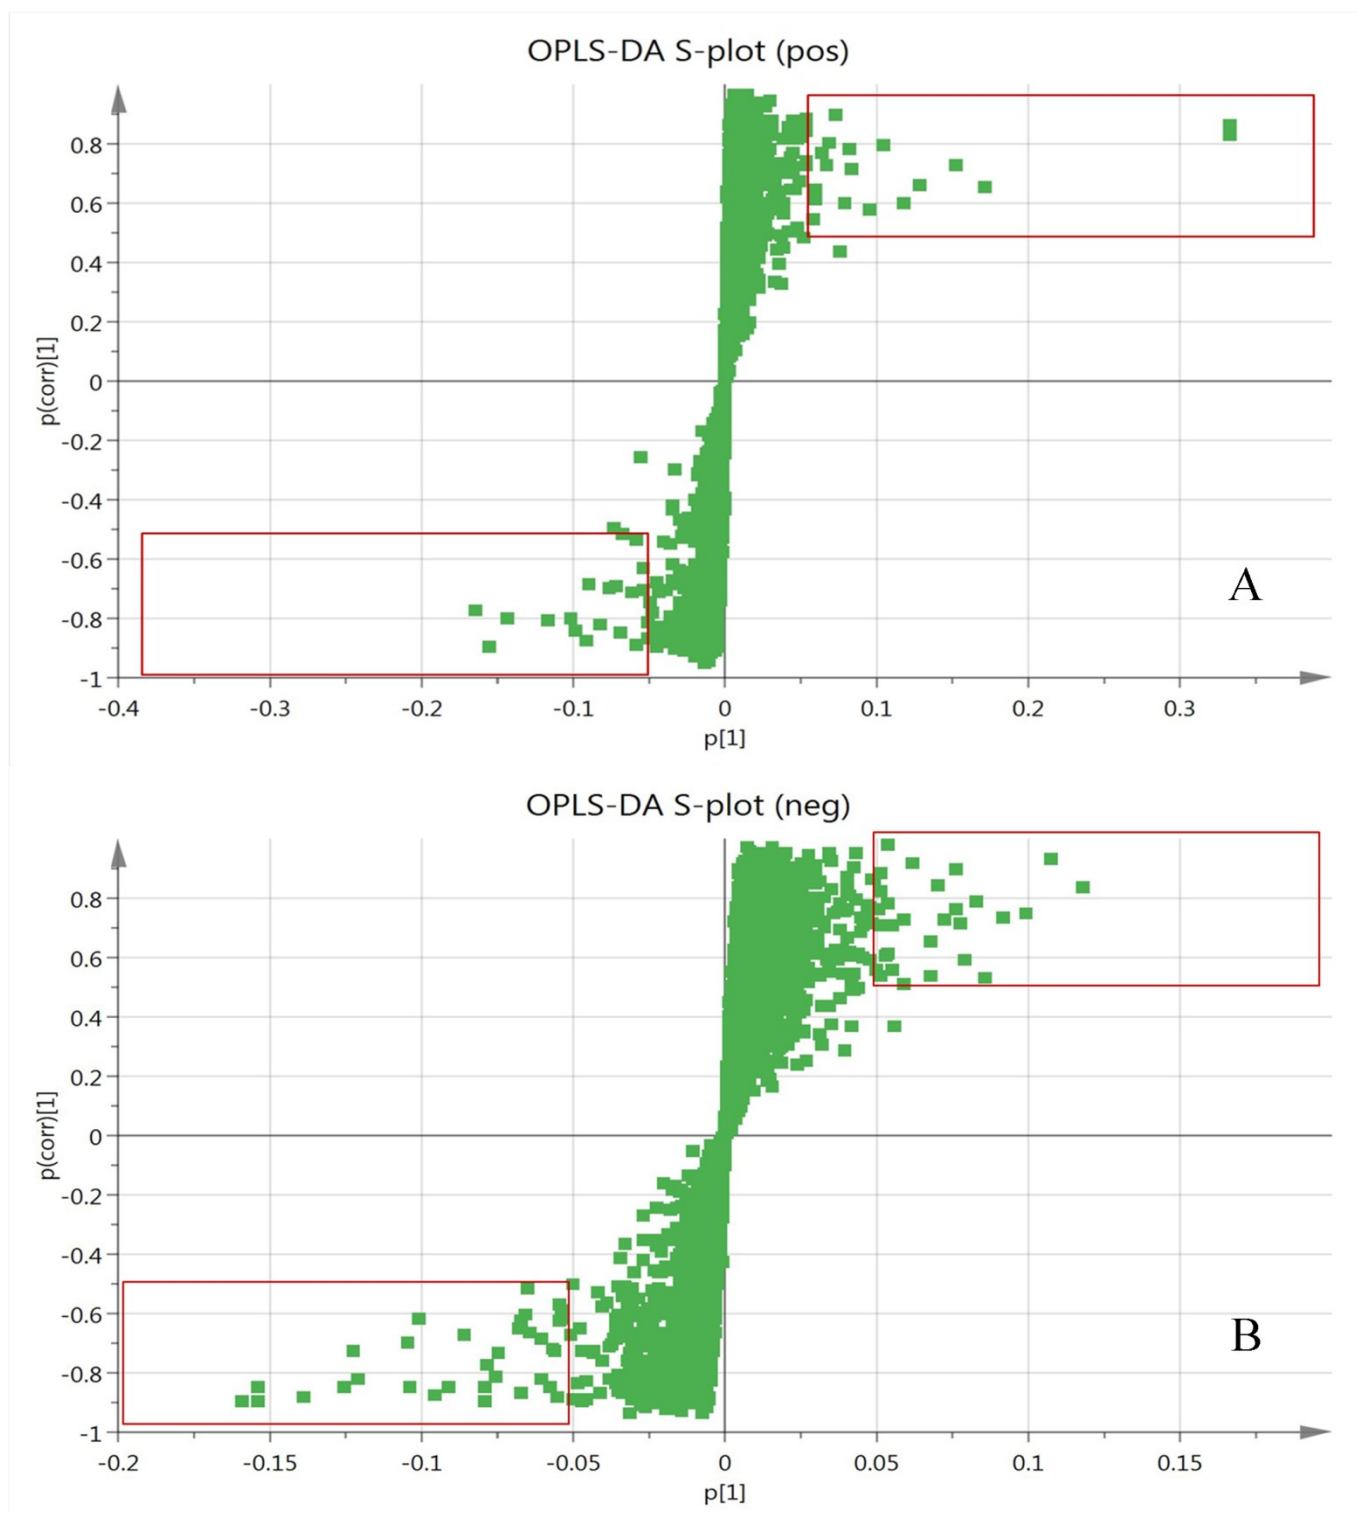

Figure S2 The S-plots of OPLS-DA both positive and negative mode.

Table S2. The classified and predicted results obtained by SVM model.

| Training Set Accuracy: 100% |        |         | Test Set Accuracy: 100% |        |         |
|-----------------------------|--------|---------|-------------------------|--------|---------|
| Samples                     | Actual | Predict | Samples                 | Actual | Predict |
| Cp-27                       | CP     | CP      | Cp-26                   | CP     | CP      |
| Cp-28                       | CP     | CP      | Cp-5                    | CP     | CP      |
| Cp-1                        | CP     | CP      | Cp-8                    | CP     | CP      |
| Cp-2                        | CP     | CP      | Cp-11                   | CP     | CP      |
| Cp-3                        | CP     | CP      | Cp-22                   | CP     | CP      |
| Cp-4                        | CP     | CP      | Gcp-4                   | GCP    | GCP     |

|        |     |     |        |     |     |
|--------|-----|-----|--------|-----|-----|
| Cp-6   | CP  | CP  | Gcp-5  | GCP | GCP |
| Cp-7   | CP  | CP  | Gcp-11 | GCP | GCP |
| Cp-9   | CP  | CP  | Gcp-20 | GCP | GCP |
| Cp-10  | CP  | CP  | Gcp-14 | GCP | GCP |
| Cp-12  | CP  | CP  | Gcp-17 | GCP | GCP |
| Cp-13  | CP  | CP  | QC-1   | QC  | QC  |
| Cp-29  | CP  | CP  | QC-9   | QC  | QC  |
| Cp-30  | CP  | CP  |        |     |     |
| Cp-31  | CP  | CP  |        |     |     |
| Gcp-19 | GCP | GCP |        |     |     |
| Gcp-13 | GCP | GCP |        |     |     |
| Gcp-15 | GCP | GCP |        |     |     |
| Gcp-16 | GCP | GCP |        |     |     |
| Gcp-18 | GCP | GCP |        |     |     |
| QC-2   | QC  | QC  |        |     |     |
| QC-3   | QC  | QC  |        |     |     |
| QC-4   | QC  | QC  |        |     |     |
| QC-5   | QC  | QC  |        |     |     |
| Cp-14  | CP  | CP  |        |     |     |
| Cp-15  | CP  | CP  |        |     |     |
| Cp-16  | CP  | CP  |        |     |     |
| Cp-17  | CP  | CP  |        |     |     |
| Cp-18  | CP  | CP  |        |     |     |
| Cp-19  | CP  | CP  |        |     |     |
| Cp-20  | CP  | CP  |        |     |     |
| Cp-21  | CP  | CP  |        |     |     |
| Cp-23  | CP  | CP  |        |     |     |
| Cp-24  | CP  | CP  |        |     |     |
| Cp-25  | CP  | CP  |        |     |     |
| Gcp-1  | GCP | GCP |        |     |     |
| Gcp-2  | GCP | GCP |        |     |     |
| Gcp-3  | GCP | GCP |        |     |     |
| Gcp-6  | GCP | GCP |        |     |     |
| Gcp-7  | GCP | GCP |        |     |     |
| Gcp-8  | GCP | GCP |        |     |     |
| Gcp-9  | GCP | GCP |        |     |     |
| Gcp-10 | GCP | GCP |        |     |     |
| Gcp-12 | GCP | GCP |        |     |     |
| QC-6   | QC  | QC  |        |     |     |
| QC-7   | QC  | QC  |        |     |     |
| QC-8   | QC  | QC  |        |     |     |

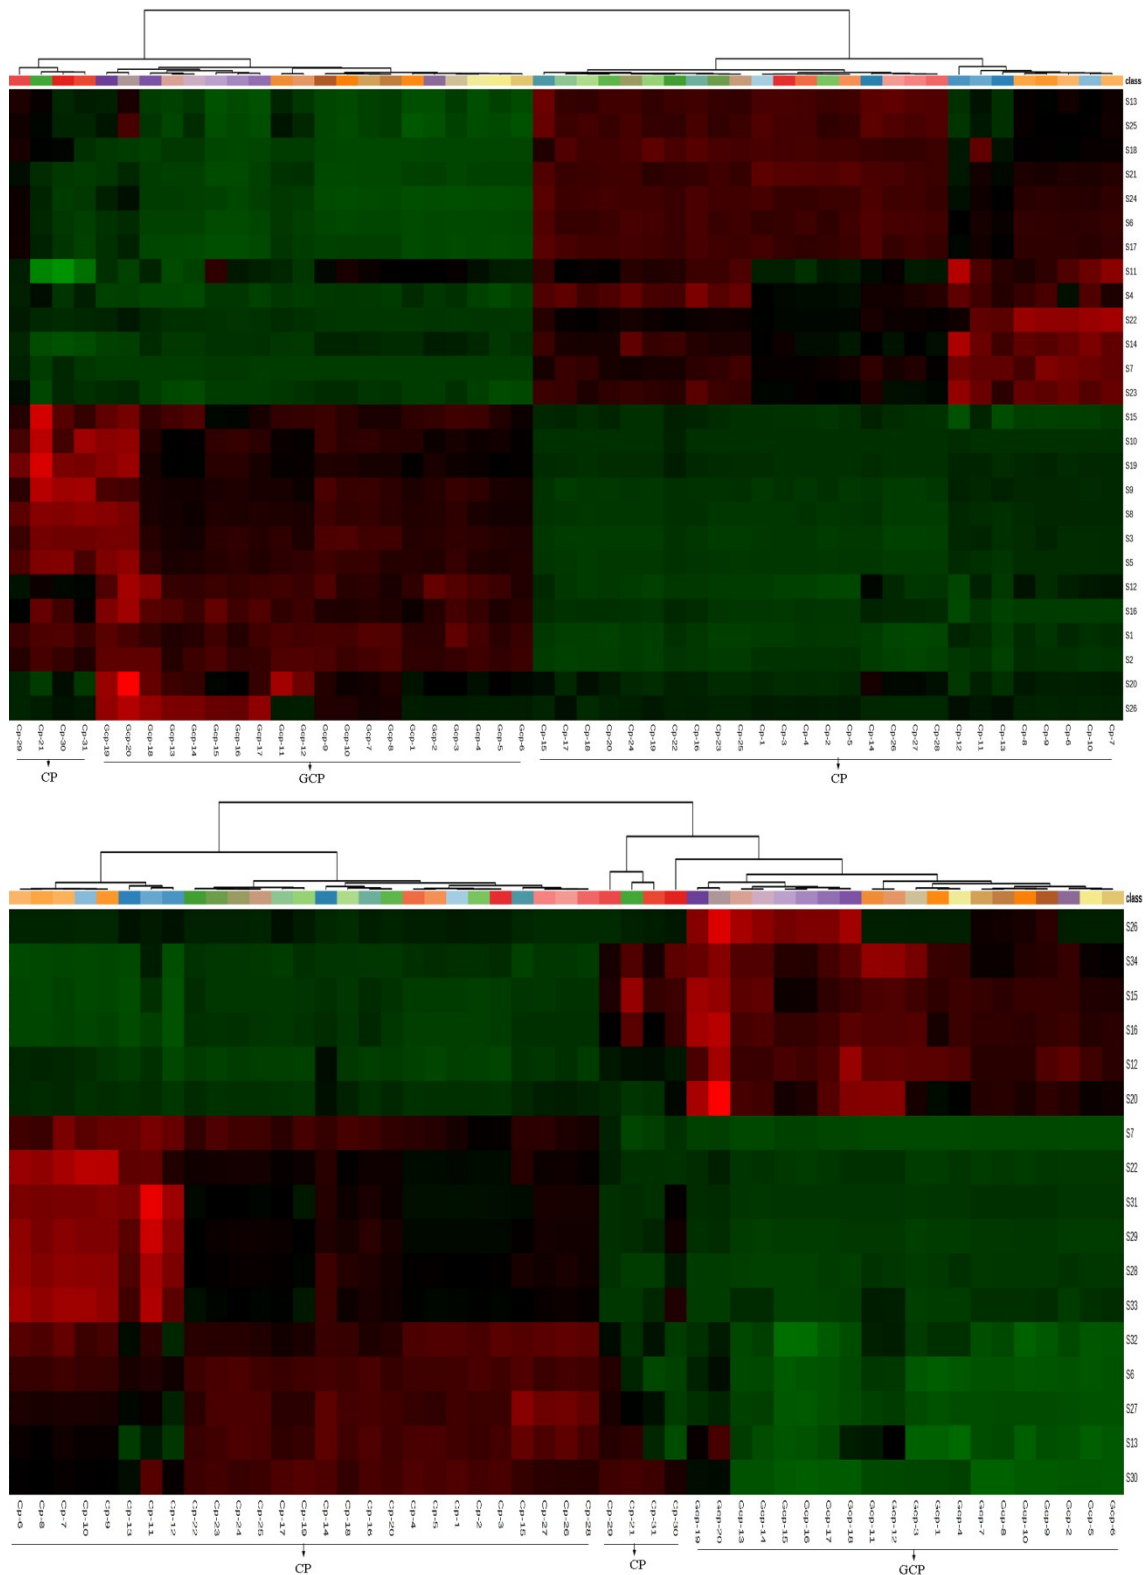

Figure S3 The heatmap of the differences of chemical markers in GCP and CP (Up: positive;Down: negative)

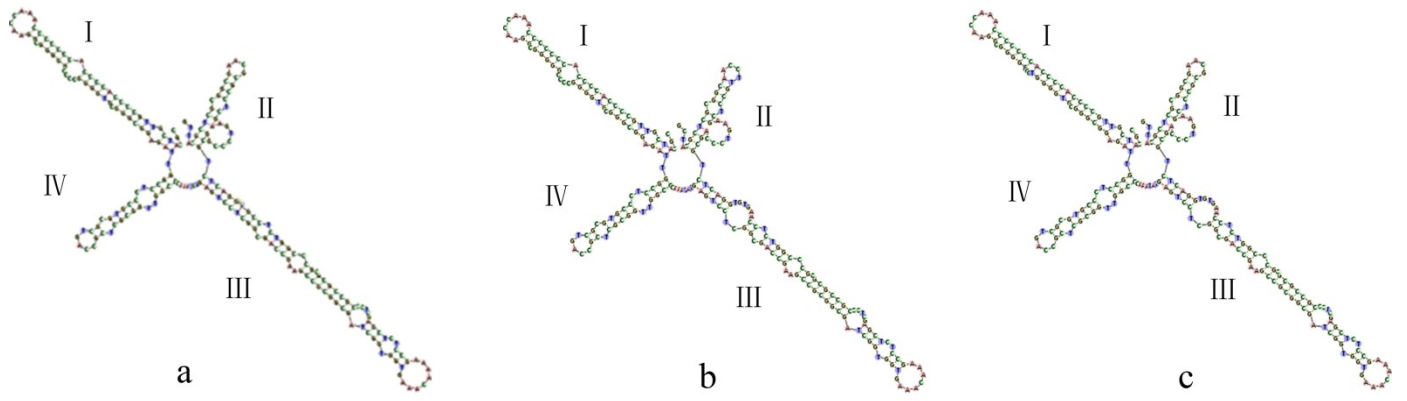

Figure S4 The secondary structures of: (a) *Citrus reticulata* ‘Chachi’; (b) *Citrus limon* (L.) Burm.; (c) *Citrus maxima* (Burm.) Merr
